# Supplementary material for: Distribution of indole-3-acetic acid in Petunia hybrida shoot tip cuttings and relationship between auxin transport, carbohydrate metabolism and adventitious root formation
Source: PubMed Central journal article supplement (PMC3751230; doi:10.1007/s00425-013-1907-z), 2013-06-14
Supplement: 425_2013_1907_MOESM1_ESM.pdf [file 425_2013_1907_MOESM1_ESM.pdf]

**Distribution of indole-3-acetic acid in *Petunia hybrida* shoot tip cuttings and relationship between auxin transport, carbohydrate metabolism and adventitious root formation**

Amir H. Ahkami, Michael Melzer, Mohammad R. Ghaffari, Stephan Pollmann, Majid Ghorbani Javid, Fahimeh Shahinnia, Mohammad R. Hajirezaei and Uwe Druege

Corresponding authors:

Uwe Druege, Leibniz Institute of Vegetable and Ornamental Crops, Erfurt, Germany, e-mail: [druege@erfurt.igzev.de](mailto:druege@erfurt.igzev.de);

Mohammad-Reza Hajirezaei, Leibniz Institute of Plant Genetics and Crop Plant Research (IPK), Gatersleben, Germany, email: [mohammad@ipk-gatersleben.de](mailto:mohammad@ipk-gatersleben.de)

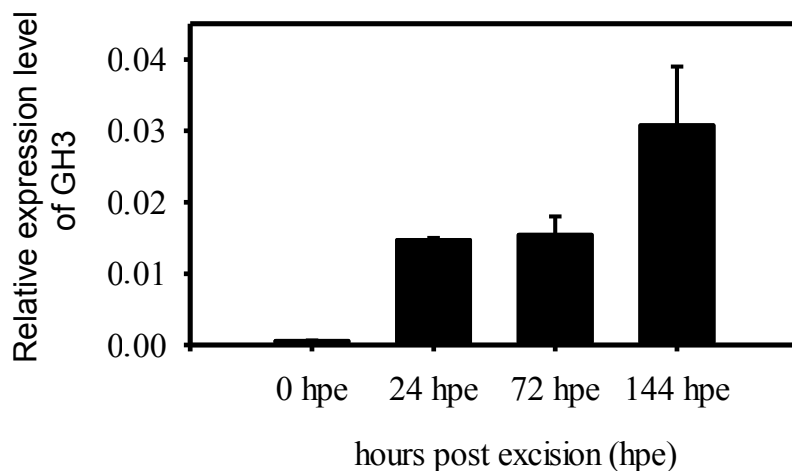

**Online Resource 1.** Quantitative Real-Time PCR of *Petunia GH3* during adventitious root formation in cuttings of *Petunia hybrida* ‘Mitchell’. Three independent biological replicates for each time point.
